# Supplementary material
Source: publisher site journal article supplement (https://www.dovepress.com/article/455705)
Supplement: Supplementary file 1 [file get_supplementary_file.php]

Figure S1. Measurements of craniofacial skeletal parameters on lateral cephalograms

S Sella, midpoint of sella turcica; N Nasion, most anterior point on frontonasal suture; A Subspinale, most concave point of anterior maxilla; B Supramental, most concave point on mandibular symphysis; P Pogonion, most anterior point of mandibular symphysis; Gn Gnathion, point located perpendicular on mandibular symphysis midway between pogonion and menton; Me Menton, lowest point on mandibular symphysis; Go Gonion, most posterior inferior point on angle of mandible; Ba Basion, most anterior point on foramen magnum; PNS, posterior nasal spine, posterior limit of bony palate or maxilla; Hor, the intersection between the greater wing and the body of the sphenoid bone; R, the intersection between posterior pharyngeal wall and PNS-Hor line; UPW, the intersection between posterior pharyngeal wall and PNS-Ba line; U, tip of soft palate; MPW, foot point at the posterior pharyngeal wall of perpendicular line from point U; V, base of epiglottis; LPW, foot point at the posterior pharyngeal wall of perpendicular line from point V; H, most superior and anterior point on the body of hyoid bone; U1, the axis of upper incisor; L1, the axis of lower incisor; C3, the anterior inferior point of the 3rd cervical vertebral.

Frankfort horizontal plane, FH plane, the line through the superior point of the auditory canal (P) and the inferior point of the optic fossa (Or); Mandibular plane, MP plane, the inferior border of the mandible through Me;

1. FH/BaN, the angle formed by basion-nasion and Frankfort plane, the inclination of the cranial base;
2. Ba-S-N, the angle of basion-sella-nasion, the cranial base angle, the relative position between anterior and posterior cranial base;
3. SNA, sella-nasion-A angle, the relative anteroposterior position of the maxilla to the cranial base;
4. SNB, sella-nasion-B angle, the relative anteroposterior position of the mandible to the cranial base;
5. ANB, A-nasion-B angle, the relative anteroposterior position of the maxilla to the mandible;
6. FH/NP, the angle between the Frankfort plane and nasion-pogonion, the degree of protrusion or retrusion of the mandible;
7. NA/PA, the angle between nasion-A and A-pogonion, convexity or concavity of skeletal profile;
8. U1/NA, the angle between the upper incisor axis and nasion-A, the inclination of the upper incisor;
9. U1/SN, the angle between the upper incisor axis and sella-nasion plane, the inclination of the upper incisor;
10. L1/NB, the angle between the lower incisor axis and nasion-B, the inclination of the lower incisor;
11. L1/MP, the angle between the lower incisor axis and the mandibular plane, the inclination of the lower incisor;
12. U1/L1, the angle formed by the axis of upper and lower incisor, the relative inclination between upper and lower incisors;
13. MP/SN, the angle formed by the mandibular plane and sella-nasion plane, the vertical relationship of MP relative to SN plane;
14. MP/FH, the angle formed by the mandibular plane and Frankfort plane, the vertical relationship of MP relative to the horizontal plane;
15. Y-axis, the angle of nasion-sella-gnathion, the degree of downward, rearward, or forward position of the chin in relation to the upper face;
16. PNS-R, the distance between the posterior nasal spine and R;
17. PNS-UPW, the distance between the posterior nasal spine and posterior wall of the upper airway;
18. SPP-SPPW, the diameter of post-soft palate upper airway;
19. U-MPW, the distance between the tip of the soft palate and the posterior wall of the upper airway;
20. PAS, posterior airway space along the gonion-B line;
21. V-LPW, the distance between the base of the epiglottis and the posterior wall of the upper airway;
22. Soft palate length, the distance between PNS to U;
23. Soft palate thickness, the thickness at the center of the soft palate;
24. Soft palate area, the area of the soft palate;
25. Tongue length, the distance between V and the tip of the tongue;
26. Tongue height, the distance between the dorsum of the tongue perpendicular to the tongue length;
27. Tongue area, the area of the tongue;
28. Contact line, the distance of the contact line between the soft palate and tongue;
29. H-MP, distance from hyoid to mandibular plane;
30. H-FH, distance from hyoid to Frankfort plane;
31. H-Me, distance from hyoid to Menton;
32. H-C3, distance from hyoid to C3.

Figure S2. The number of clusters identified by the average silhouette width (ASW).

The ASW measures the global goodness of clustering; the larger the ASW, the better the split of clustering. Therefore, the current study identified two phenotypes of catathrenia.

Table S1. The craniofacial anatomical characteristics between clusters measured with lateral cephalograms.

|  | Total  (n=66) | Cluster 1  (n=17) | Cluster 2  (n=49) | *P*  total | *P*  males | *P*  females |
| --- | --- | --- | --- | --- | --- | --- |
| Maxillofacial structures |  |  |  |  |  |  |
| FH/BaN (°) | 28.8±2.2 | 28.1±2.1 | 29.0±2.2 | 0.127 | 0.555 | 0.518 |
| Ba-S-N (°) | 131.2±4.9 | 132.5±5.8 | 130.8±4.6 | 0.218 | 0.144 | 0.151 |
| SNA (°) | 81.6±3.5 | 81.5±4.6 | 81.7±3.0 | 0.900 | 0.668 | 0.103 |
| SNB (°) | 78.6±3.7 | 78.1±4.9 | 78.8±3.2 | 0.614 | 0.786 | 0.059 |
| ANB (°) | 3.1±2.5 | 3.4±2.5 | 2.9±2.5 | 0.479 | 0.343 | 0.639 |
| FH/NP (°) | 87.4±3.2 | 86.7±4.4 | 87.7±2.8 | 0.284 | 0.396 | 0.441 |
| NA/PA (°) | 5.4±5.9 | 6.0±5.7 | 5.2±6.1 | 0.611 | 0.292 | 0.893 |
| U1/NA (°) | 25.2±6.5 | 23.0±7.1 | 26.0±6.2 | 0.093 | 0.209 | 0.073 |
| U1/SN (°) | 106.9±6.6 | 104.5±8.2 | 107.7±5.9 | 0.084 | 0.288 | 0.006** |
| L1/NB (°) | 29.5±5.8 | 29.4±6.2 | 29.5±5.7 | 0.978 | 0.488 | 0.313 |
| L1/MP (°) | 95.0±6.5 | 94.9±6.2 | 95.1±6.6 | 0.925 | 0.521 | 0.599 |
| U1/L1 (°) | 122.2±9.1 | 124.2±10.2 | 121.5±8.8 | 0.310 | 0.701 | 0.090 |
| MP/SN (°) | 35.9±6.1 | 36.4±7.2 | 35.7±5.8 | 0.657 | 0.180 | 0.519 |
| MP/FH (°) | 27.5±5.3 | 28.2±6.5 | 27.2±4.8 | 0.493 | 0.076 | 0.801 |
| Y-axis (°) | 65.5±6.4 | 66.4±7.4 | 65.2±6.0 | 0.524 | 0.135 | 0.493 |
| Upper airway |  |  |  |  |  |  |
| PNS-R (mm) | 23.8±3.4 | 25.6±3.3 | 23.2±3.3 | 0.012* | 0.036* | 0.042* |
| PNS-UPW (mm) | 28.7±3.6 | 31.6±2.6 | 27.6±3.3 | 0.000*** | 0.006** | 0.014* |
| SPP-SPPW (mm) | 18.8±4.4 | 21.2±3.9 | 17.9±4.2 | 0.007** | 0.319 | 0.039* |
| U-MPW (mm) | 12.6±4.0 | 15.2±2.7 | 11.8±4.1 | 0.002** | 0.202 | 0.083 |
| PAS (mm) | 12.9±4.7 | 15.1±6.1 | 12.1±3.9 | 0.022* | 0.714 | 0.062 |
| V-LPW (mm) | 17.8±5.5 | 18.8±7.5 | 17.5±4.7 | 0.408 | 0.834 | 0.985 |
| Soft palate length (mm) | 36.2±4.5 | 37.4±4.5 | 35.7±4.5 | 0.189 | 0.895 | 0.632 |
| Soft palate thickness (mm) | 9.9±1.6 | 10.1±2.1 | 9.8±1.3 | 0.506 | 0.880 | 0.414 |
| Soft palate area (mm2) | 273±54 | 291±68 | 267±48 | 0.119 | 0.948 | 0.488 |
| Tongue height (mm) | 38.0±3.6 | 38.1±4.0 | 38.0±3.6 | 0.941 | 0.398 | 0.996 |  |  |
| Tongue length (mm) | 66.2±7.3 | 68.6±9.1 | 65.4±6.4 | 0.118 | 0.558 | 0.662 |
| Tongue area (mm2) | 2748±333 | 2847±468 | 2713±269 | 0.280 | 0.668 | 0.273 |
| Contact line (mm) | 24.6±10.7 | 24.2±16.5 | 24.7±7.9 | 0.916 | 0.780 | 0.352 |
| H-MP (mm) | 10.1±5.7 | 10.5±7.3 | 10.0±5.1 | 0.749 | 0.758 | 0.398 |
| H-FH (mm) | 89.6±11.5 | 89.4±9.7 | 89.6±12.2 | 0.949 | 0.613 | 0.338 |
| H-Me (mm) | 39.5±6.6 | 41.0±5.4 | 39.0±6.9 | 0.285 | 0.577 | 0.716 |
| H-CV3 (mm) | 34.5±5.0 | 35.1±7.6 | 34.3±3.8 | 0.674 | 0.458 | 0.444 |

Data were summarized as mean ± standard.

**p*<0.05; ***p*<0.01; *** *p*<0.001.
